# Supplementary material for: Study of the zeolite-catalyzed isomerization of 1-methylnaphthalene
Source: Royal Society of Chemistry journal article supplement (doi:10.1039/d4ra05881j), 2024-01-01
Supplement: d4ra05881j1.pdf [file d4ra05881j1.pdf]

## Supporting Information

### Study of the zeolite catalyzed isomerization of 1-methylnaphthalene

*Shiyong Xing*<sup>a\*‡</sup>, *Yan Cui*<sup>b, c‡</sup>, *Fenglin Zhang*<sup>a</sup>, *Jianbin Su*<sup>a</sup>, *Kan Xu*<sup>a</sup>, *Xiaofei Liu*<sup>b</sup>, *Ziheng Chen*<sup>b</sup>, *Yuehua Zhao*<sup>b</sup>, *Minghan Han*<sup>b\*</sup>

<sup>a</sup> Beijing Special Engineering Design and Research Institute, Beijing 100028, China.

<sup>b</sup> Beijing Key Laboratory of Green Chemical Reaction Engineering and Technology, Department of Chemical Engineering, Tsinghua University, Beijing 100084, P. R. China.

<sup>c</sup> Petrochemical Research Institute, PetroChina Company Limited, Beijing 100195, China.

‡ Shiyong Xing and Yan Cui contributed equally to this work.

\*Email: [xingsy18@tsinghua.org.cn](mailto:xingsy18@tsinghua.org.cn) , [hanmh@tsinghua.edu.cn](mailto:hanmh@tsinghua.edu.cn)

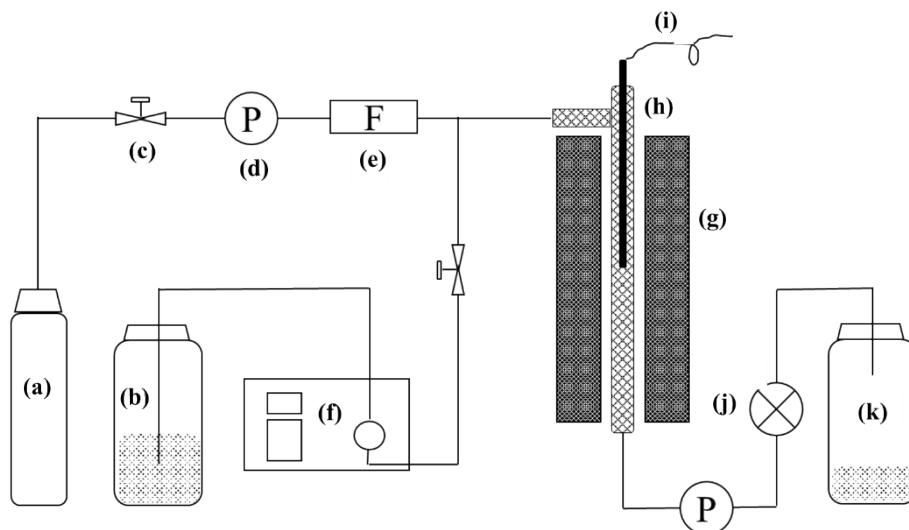

**Fig. S1.** The schematic flow diagram of the catalyst evaluation equipment. (a) N<sub>2</sub> cylinder, (b) feedstocks, (c) globe valve, (d) pressure gauge, (e) flowmeter, (f) pump, (g) furnace, (h) reactor, (i) thermocouple, (j) back pressure valve, (k) products.

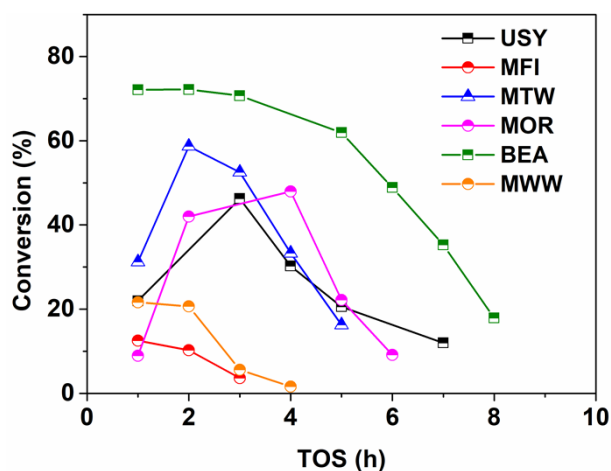

**Fig. S2.** Comparison of the catalytic performances of zeolites with different frameworks. Reaction conditions: vapor phase, 260 °C, 0.1 MPa, 13 wt% 1-MN/benzene, 5 h<sup>-1</sup>, 20 ml/min N<sub>2</sub>.

The isomerization of 1-MN was conducted over zeolites with different frameworks. As can be seen from Fig. S2, MFI and MWW exhibited poor activity, and the conversion of MWW decreased to 0 in only 4 h. MOR, USY and ZSM-12 exhibited similar performances, of which the

conversion all increased firstly, and then decreased gradually. Among all the tested zeolites, Beta exhibited the superior performance, therefore the discussion in the main text was mainly based on Beta.

### **S1. Preparation of feedstocks with different amount sulfide and nitride**

The amount of sulfide and nitride within the raw feedstocks is shown in TableS1. Different amount of sulfide and nitride was prepared by the adsorption process. Specifically, 3.6 g HY or clay was mixed with 60 ml 1-MN, and then the mixture was stirred at 25 °C for 24 h. After that, the mixture was filtered to obtain the purified feedstocks. As can be seen from Table S1, HY exhibits better performance than clay.

**Table S1** Feedstocks with different amount of sulfide and nitride.

|                    | Sulfide (ppm) | Nitride (ppm) |
|--------------------|---------------|---------------|
| Initial state      | 4744.19       | 1188.28       |
| Adsorption by HY   | 4767.96       | 824.57        |
| Adsorption by clay | 4768.68       | 1103.02       |
